# Supplementary material
Source: PubMed Central journal article supplement (PMC2895110)
Supplement: 1002716107_pnas.1002716107_SI.pdf [file 1002716107_pnas.1002716107_SI.pdf]

# Supporting Information

Cho et al. 10.1073/pnas.1002716107

## SI Text

**SI Methods. Phosphodiesterase inhibition studies.** Using recombinant human phosphodiesterase enzymes expressed and purified in a baculoviral system as previously described (1), AV411 (ibudilast, 3-isobutyryl-2-isopropylpyrazolo-[1,5-a]pyridine) and AV1013 were assayed for inhibition of conversion of  $^3\text{H}$ -cAMP to  $^3\text{H}$ -AMP or  $^3\text{H}$ -cGMP to  $^3\text{H}$ -GMP using a modification of the two-step method of Thompson and Appleman (2) adapted for 96 well plate format. The assay contained one unit of enzyme (amount of enzyme that converts 1 pmole cAMP to AMP, or cGMP to GMP per min at pH 7.5 at 30 °C) and the compounds were dissolved in 5% DMSO to a concentration of 10  $\mu\text{M}$ . The data are expressed as percent inhibition of each phosphodiesterase (PDE) isoform at 10  $\mu\text{M}$ , and is a mean of duplicate datapoints.

**Enzymatic and chemotactic inhibition assays.** *p*-Hydroxyphenylpyruvate (HPP) tautomerization experiments were performed at 306 nm in triplicate. Inhibition constants were determined by nonlinear regression against noncompetitive and competitive equations using Prism4 (GRAPHPAD).

For cellular assays, various concentrations of AV411 or AV1013 were incubated with 8 nM macrophage migration inhibitory factor (MIF) in peripheral blood mononuclear cell (PBMC) migration experiments (3). Control experiments were also carried out using recombinant MIP-1 $\alpha$  (8 nM; Pierce) as well as IL-8 (8 nM; eBioscience) and a dilution series of AV411 and AV1013 (both R and S enantiomers). Blocking antibodies to human CXCR2 (R&D Systems), CXCR4 (R&D Systems), and CD74 (BD Pharmingen) were used alone or in combination at a concentration of 10  $\mu\text{g}/\text{mL}$ . In these antibody assays, PBMCs were incubated with antibodies for 30 min at 37 °C in RPMI medium 1640 prior to their use. Results are expressed as the mean number of cells counted per high-power field for each of more than two fields  $\pm$  SEM.

**Fluorescence spectroscopy.** Assays were performed in 0.424 M borate to make the aqueous condition consistent with that for enzyme kinetics. Base lines for each inhibitor at different concentrations were established with inhibitor alone in the assay buffer. Fluorescence quenching experiments were done by 814 Photomultiplier Detection System (Photon Technology International, Inc.) using the acquisition program LabWork provided by the manufacturer. Three repeats of assay for each inhibitor were linearly regressed by Prism.

**NMR spectroscopy.** For the AV411 heteronuclear single quantum coherence (HSQC) experiment, reference (no inhibitor) and inhibitor-containing samples were prepared by mixing 700  $\mu\text{L}$  of  $^{15}\text{N}$ -labeled rhMIF (400  $\mu\text{M}$ ) and 78  $\mu\text{L}$  of  $\text{D}_2\text{O}$ , splitting it in half into two NMR tubes, and adding 4.2  $\mu\text{L}$  of 100% DMSO and 50 mM AV411 (in 100% DMSO), respectively. For the AV1013 transverse relaxation optimized spectroscopy (TROSY) experiments, 200  $\mu\text{M}$  of  $^{15}\text{N}$ -labeled rhMIF with 10%  $\text{D}_2\text{O}$  was mixed with either 88  $\mu\text{L}$  of 50 mM of AV1013 or the same volume of DMSO as a reference. All of the experiments were carried out at 25 °C in a Varian INOVA 600 MHz spectrometer with a 5-mm triple resonance probe equipped with triple-axis (*xyz*) pulsed magnetic field gradients. Spectra were processed and analyzed using the software programs nmrPipe (4) and Sparky (<http://www.cgl.ucsf.edu/home/sparky/>).

**X-ray crystallography.** MIF was cocrystallized with (*R*)-AV1013 using the hanging drop vapor diffusion method. A solution containing 1.1 mM MIF and 5 mM (*R*)-AV1013 in 10% DMSO, 18 mM Tris (pH 7.5), 18 mM NaCl was mixed 1:1 with reservoir solution containing 2 M  $(\text{NH}_4)_2\text{SO}_4$ , 0.5 M NaCl, 0.1 M Tris (pH 7.5), 3% isopropanol, and incubated at 37 °C. For the ternary complex of MIF with both HPP and (*R*)-AV1013, a solution of 1.0 mM MIF, 5 mM (*R*)-AV1013, 10 mM HPP in 10% DMSO, 0.1 M acetate (pH 6.0), 14 mM Tris, 14 mM NaCl was mixed 1:1 with the same reservoir solution. Each crystal was soaked in cryoprotectant solution containing 3 M NaCl, 2 M  $(\text{NH}_4)_2\text{SO}_4$ , 50 mM Tris (pH 7.5). For the binary complex crystal, data were collected on a Rigaku micromax generator with an R-Axis IV image-plate detector. Data from a crystal of MIF/(*R*)-AV1013/HPP were collected at beamline X29 of the National Synchrotron Light Source at Brookhaven National Laboratory. Diffraction data were processed using HKL2000. The structures were determined by molecular replacement using unliganded MIF (PDB 3DJH) (5). In each structure, (*R*)-AV1013 is bound in only one of three allosteric sites due to crystal packing. HPP is found in all three active sites of the ternary complex. Refinement was performed using the programs CNS (6), ShelXL (7), and REFMAC (8). The dihedral and bond angle parameters in the dictionary files were relaxed for one of the HPP forms in the inhibited site to fit the 1.25 Å electron density. Manual adjustments to the model were made using O (9) and COOT (10).

## Synthesis and resolution of AV1013 (Scheme S1).

**Step 1: Benzyl 1-(methoxy(methyl)amino)-1-oxopropan-2-yl carbamate.** (*R*, *S*)-2-Benzoyloxycarbonylamino-propionic acid (12.15 g, 54.4 mmol), diisopropylethylamine (28.4 mL, 163.3 mmol), (benzotriazol-1-yloxy)tris(dimethylamino)phosphonium hexafluorophosphate (BOP Reagent) (28.89 g, 65.3 mmol), and tetrahydrofuran (THF) (300 mL) were combined and stirred at 0 °C. *N*,*O*-dimethylhydroxylamine hydrochloride (6.37 g, 65.3 mmol) was added to the mixture, and the reaction was stirred for 18 h. The reaction was quenched with saturated ammonium chloride solution and extracted with ethyl acetate. The organic layer was dried over sodium sulfate, filtered, and concentrated in vacuo. The crude material was purified by silica gel flash chromatography (0–60% ethyl acetate in hexanes) to give 13.48 g (93%) of benzyl 1-(methoxy(methyl)amino)-1-oxopropan-2-yl carbamate.

## Step 2: Benzyl 6-methyl-3-oxohept-4-yn-2-yl carbamate.

3,3-Dimethyl-but-1-yne (68.5 mL, 1.00 mole) was dissolved in THF (1 L), and the solution was cooled to –78 °C. *n*-butyllithium (2.5 M in hexanes, 300 mL, 750 mmol) was slowly added to a stirred solution, at a rate that maintained a temperature below –65 °C. The reaction mixture was stirred for 30 min, and a solution of benzyl 1-(methoxy(methyl)amino)-1-oxopropan-2-yl carbamate (41.4 g, 156 mmol) in THF (1 L) was slowly added to the stirring reaction mixture, at a rate that maintained a temperature below –65 °C. The combined reaction mixture was stirred at –78 °C for 1 h. The reaction was quenched by pouring into saturated ammonium chloride solution and extracted with ethyl acetate. The organic layer was dried over sodium sulfate and concentrated in vacuo. The crude material (43.32 g, 102%) was used in the next step without further purification, because of limited stability.







**Table S1. Percent inhibition of AV411 and AV1013 at 10  $\mu$ M against pure recombinant human PDE isozymes**

| PDE isozyme  | AV411 | AV1013 |
|--------------|-------|--------|
| PDE3 (cAMP)  | 25    | 5      |
| PDE4 (cAMP)  | 57    | 1      |
| PDE10 (cAMP) | 66    | 15     |
| PDE10 (cGMP) | 81    | 27     |
| PDE11 (cAMP) | 40    | 14     |
| PDE11 (cGMP) | 30    | 11     |

**Table S2. Inhibition of MIF-induced migration of human PBMCs by monoclonal antibodies directed against MIF receptors**

| Assay                            | Avg no. of migrated cells | % enhancement of migration relative to MIF alone [(assay-Neg)/(MIF-Neg) $\times$ 100] | % inhibition | P value (relative to MIF alone in the same experiment) |
|----------------------------------|---------------------------|---------------------------------------------------------------------------------------|--------------|--------------------------------------------------------|
| Experiment no. 1 (Fig. 2C)       |                           |                                                                                       |              |                                                        |
| Negative control                 | 53.17                     | 0.0                                                                                   |              | <0.01                                                  |
| MIF                              | 108.3                     | 100.0                                                                                 |              |                                                        |
| $\alpha$ -CD74                   | 110.0                     | 103.1                                                                                 | -3.1         | >0.05                                                  |
| $\alpha$ -CXCR2                  | 70.50                     | 31.4                                                                                  | 68.6         | <0.01                                                  |
| $\alpha$ -CXCR4                  | 83.50                     | 55.0                                                                                  | 45.0         | >0.05                                                  |
| $\alpha$ -CD74/ $\alpha$ -CXCR2  | 74.17                     | 38.1                                                                                  | 61.9         | <0.05                                                  |
| $\alpha$ -CD74/ $\alpha$ -CXCR4  | 82.17                     | 52.6                                                                                  | 47.4         | >0.05                                                  |
| $\alpha$ -CXCR2/ $\alpha$ -CXCR4 | 65.17                     | 21.8                                                                                  | 78.2         | <0.01                                                  |
| Experiment no. 2 (Fig. S1D)      |                           |                                                                                       |              |                                                        |
| Negative control                 | 51.83                     | 0.0                                                                                   |              | <0.01                                                  |
| MIF                              | 142.2                     | 100.0                                                                                 |              |                                                        |
| MIF + 3Abs                       | 72.00                     | 22.3                                                                                  | 77.7         | <0.01                                                  |

**Table S3. Residues with large and moderate NMR chemical shift changes in the presence of each inhibitor**

|        | Large shifts                                                                                                                       | Moderate shifts                                                                                                                                                             |
|--------|------------------------------------------------------------------------------------------------------------------------------------|-----------------------------------------------------------------------------------------------------------------------------------------------------------------------------|
| AV411  | F3, <u>Q35</u> , <u>Y36</u> *, A38, G50, <u>H62</u> , S63, <u>I64</u> , G65, K66, I67, N72, G107, <u>N109</u> , <u>T112</u> , F113 | M2, N6, <u>Q28</u> , <u>T30</u> , G31, K32, V39, H40, V41, D44, M47, <u>F49</u> , <u>G51</u> , S60, S74, L87, I89, <u>R93</u> , Y98, <u>D100</u> , N102, <u>N105</u> , S111 |
| AV1013 | S20, <u>Q35</u> , <u>Y36</u> , <u>H62</u> , <u>I64</u> , <u>N109</u> , <u>T112</u>                                                 | <u>Q28</u> , <u>T30</u> , I37, <u>F49</u> , G50, <u>G51</u> , E54, S63, K66, I67, R73, C80, <u>R93</u> , V94, Y98, <u>D100</u> , <u>N105</u> , G107, W108, F113             |

\*Common residues between the two inhibitors are underlined.

**Table S4. Crystallographic statistics of the MIF-AV1013 and MIF-AV1013-HPP structures**

|                                        | MIF(R)-AV1013       | MIF(R)-AV1013/HPP   |
|----------------------------------------|---------------------|---------------------|
| <i>Data collection</i>                 |                     |                     |
| Space group                            | $P2_12_12_1$        | $P2_12_12_1$        |
| Cell dimensions                        |                     |                     |
| <i>a</i> , <i>b</i> , <i>c</i> , Å     | 66.96, 68.04, 87.28 | 67.24, 67.91, 87.33 |
| $\alpha$ , $\beta$ , $\gamma$ , °      | 90, 90, 90          | 90, 90, 90          |
| Resolution, Å                          | 1.70 (1.73-1.70) *  | 1.25 (1.27-1.25)    |
| $R_{\text{sys}}$ or $R_{\text{merge}}$ | 0.073 (0.514)       | 0.064 (0.475)       |
| $I/\sigma$                             | 21.7 (2.02)         | 26.7 (2.61)         |
| Completeness, %                        | 99.5 (96.0)         | 99.9 (100.0)        |
| Redundancy                             | 4.3 (3.7)           | 4.8 (4.7)           |
| <i>Refinement</i>                      |                     |                     |
| Resolution, Å                          | 1.70                | 1.25                |
| No. reflections                        | 42,687              | 110,630             |
| $R_{\text{work}}/R_{\text{free}}$      | 0.194/0.206         | 0.162/0.185         |
| No. atoms                              |                     |                     |
| Protein                                | 2,604               | 2,647               |
| Ligand/ion                             | 27                  | 103                 |
| Water                                  | 393                 | 486                 |
| <i>B</i> factors                       |                     |                     |
| Protein                                | 20.62               | 14.24               |
| Ligand/ion                             | 51.92               | 29.33               |
| Water                                  | 31.64               | 28.79               |
| rms deviations                         |                     |                     |
| Bond lengths, Å                        | 0.005               | 0.006               |
| Bond angles, °                         | 1.3                 | 1.2                 |

Data were collected on one crystal for each structure.

\*Values in parentheses are for highest-resolution shell.

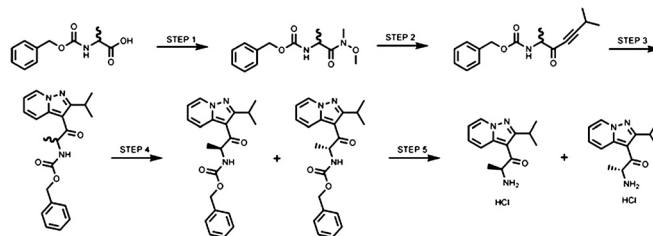

**Scheme S1.** Synthesis and resolution of AV1013

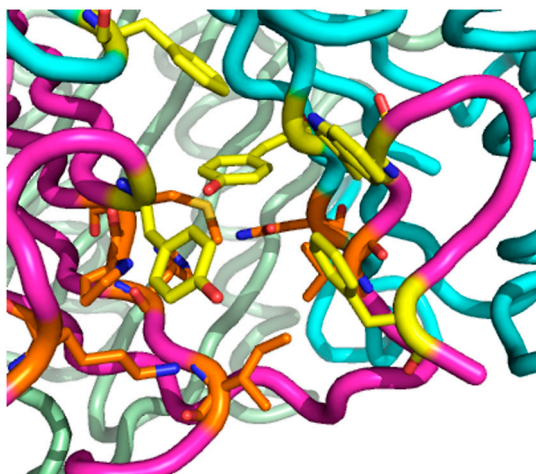

**Movie S1.** Conformational change of MIF, which leads to the formation of an induced allosteric binding site, upon binding of HPP and AV1013R was generated by morphing from an unbound MIF (PDB ID code 1MIF) to a ternary complex state MIF/HPP/AV1013R (PDB ID code 3JJ).

[Movie S1 \(MOV\)](#)
